# Supplementary material for: Improving Widescale Monitoring of Ectoparasite Presence in Northern Canadian Wildlife with the Aid of Citizen Science
Source: MDPI journal article supplement (doi:10.3390/insects13040380), 2022-04-12
Supplement: s1 [file s1]

Chenery et al., 2022. Improving widescale monitoring of ectoparasite presence in northern Canadian wildlife with the aid of Citizen Science.

## **Supplementary materials S1**

### **Yukon Winter Tick Monitoring Project Sample Kit**

Description and template materials for the Yukon Winter Tick Monitoring Project (YWTMP) hide sample kit.

Collecting a sample from the areas of known high tick-abundance on an animal, namely the neck and shoulder region or rump, is a common means of assessing winter tick presence (Samuel, 2004; Sine et al., 2009). This kit is designed to obtain a 40 x 20cm section of moose or caribou hide from the right shoulder of the animal, so that it can be visually assessed for winter ticks (*Dermacentor albipictus*).

Note that full host burden (full body tick density estimate) cannot be assessed from this method, which provides a coarse approximation of relative tick numbers per host and presence only data.

#### *Materials needed*

Large Ziploc™ bag (26.8 x 27.3cm)

Submission details label (*Appendix A*)

Nitrile gloves (x1 pair, Large size)

Paper template: sample location template & instructions (*Appendix B*)

#### *Kit assembly*

1. Label Ziploc™ bag with submission label. Ensure that unique identifier is written into the Sample Kit ID field, and recorded in the lab spreadsheet.
2. Print double-sided paper instructions and template and trim excess paper following guidelines.
3. Place template and one pair of nitrile gloves inside the bag and seal.

---

#### Literature cited:

- Samuel, W. M. (2004). White as a Ghost: Winter ticks and moose. Natural History Series. Alberta: Federation of Alberta Naturalists.
- Sine, M., K. Morris and D. Knupp. (2009). Assessment of a line transect field method to determine winter tick abundance on moose. *Alces* 45: 143–46.

**Section A. Submission Kit Label**

**Sample kit ID:** \_\_\_\_\_

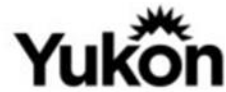

**Kill date:** \_\_\_\_\_

**Species (circle):**      **CARIBOU**      **MOOSE**

**Sex (circle):**              **MALE**      **FEMALE**

**Kill location (Latitude/Longitude - please be as specific as possible):** \_\_\_\_\_

\_\_\_\_\_

# Instructions:

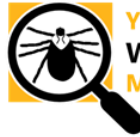

Yukon  
Winter Tick  
Monitoring Project

Turn over  
for Template

**Within 6 hours of kill**

## Step 1. CUT SAMPLE

Cut 1 piece of hide approx.  
40x20cm (use template)

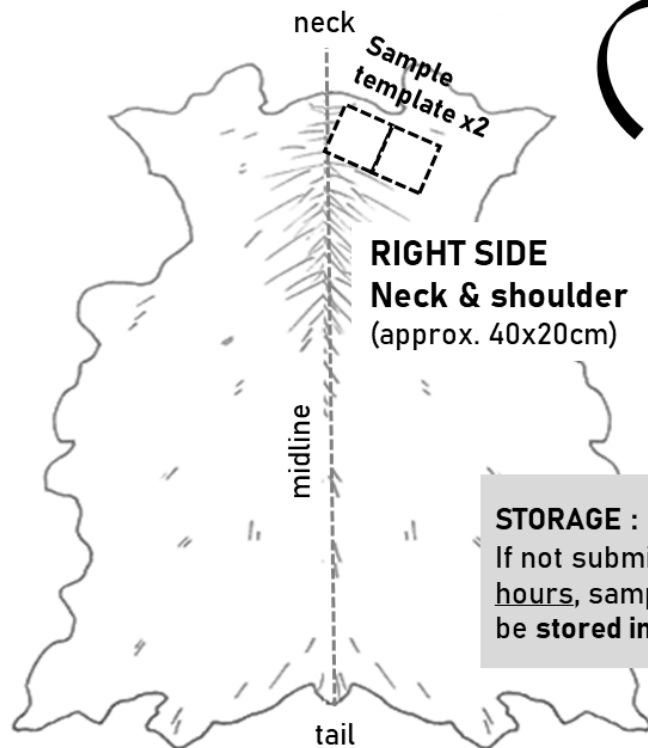

## Step 2. FOLD SAMPLE

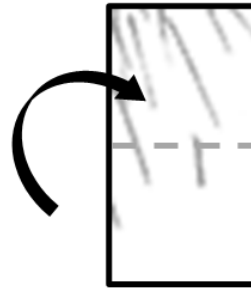

## Step 3. BAG SAMPLE

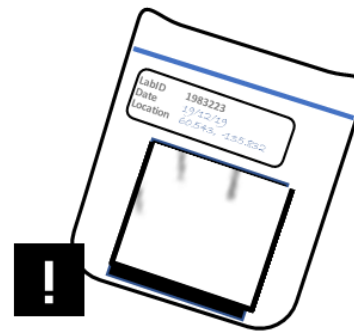

Please ensure bag  
is fully sealed, and  
that you have  
completed the  
label on the  
sample bag,  
including:

- Kill DATE
- Kill LOCATION\*

*\* Please be as specific  
as possible, as this  
helps us to find the ticks  
in the landscape.*

### STORAGE :

If not submitting within 24  
hours, sample bags can  
be stored in the freezer.

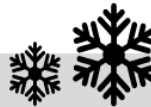

- Note - all information received will be kept confidential.

[OFFICE USE]

### Printing instructions :

- print double-sided
- cut this edge off
- fold so that  
"Instructions"  
title is clearly  
visible
- place leaflet in  
sample bag.

Section C. Hide sample kit template and instructions (side 2)

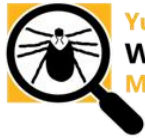

Yukon  
Winter Tick  
Monitoring Project

Turn over for  
full  
instructions

# Sample Template

Cut approx.  
2x size  
(40 x 20cm)

RIGHT SIDE  
neck & shoulder  
region

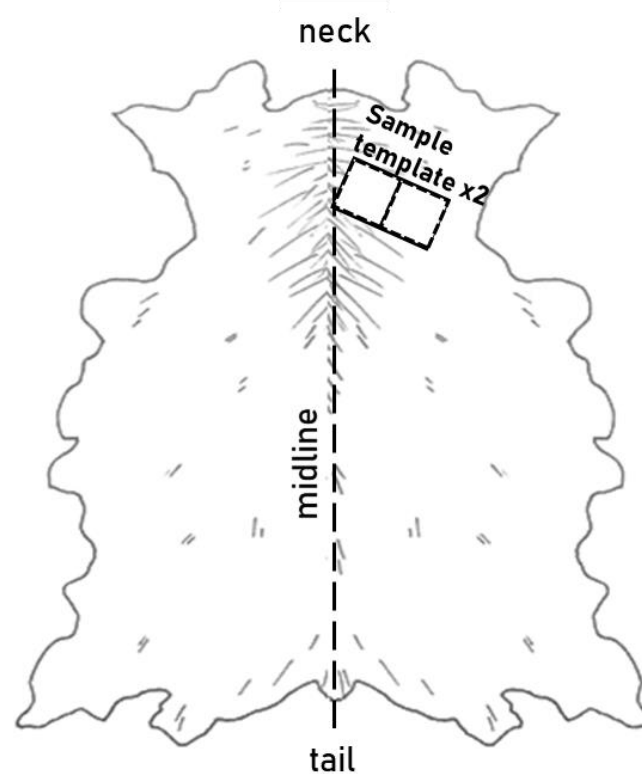

Approx. 20cm

Approx. 20cm
